# Supplementary material for: Cu2O@Co/N-doped carbon as antibacterial catalysts for oxygen reduction in microbial fuel cells
Source: Royal Society of Chemistry journal article supplement (doi:10.1039/d2en00980c), 2022-12-06
Supplement: d2en00980c1.pdf [file d2en00980c1.pdf]

## Supporting information

### $\text{Cu}_2\text{O}@$ Co/N-doped carbon as antibacterial catalysts for oxygen reduction in microbial fuel cells

Huina Chen<sup>†,‡,#</sup>, Demin Jiang<sup>†,‡,#</sup>, Hao Xie<sup>†</sup>, Yuxin Liu<sup>†</sup>, Shishi Li<sup>†</sup>, Yuqiao Wang<sup>†,\*</sup>

<sup>†</sup>Research Center for Nano Photoelectrochemistry and Devices, School of Chemistry and Chemical Engineering, Southeast University, Nanjing 211189, China

<sup>‡</sup>School of Environmental and Chemical Engineering, Chongqing Three Gorges University, Chongqing 404100, China

\*Corresponding author (Email: yqwang@seu.edu.cn).

#These authors contributed equally to this work.

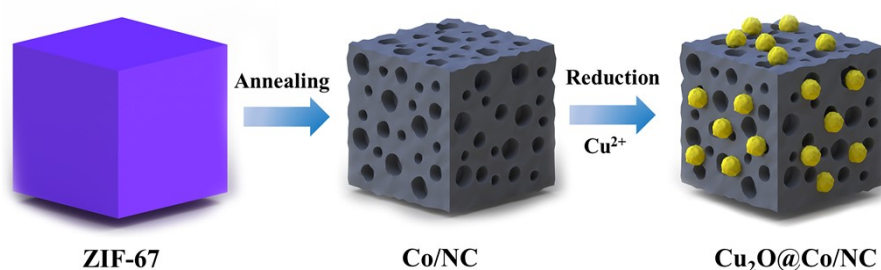

Figure S1. Schematic illustration for synthesis of  $\text{Cu}_2\text{O}@$ Co/NC.

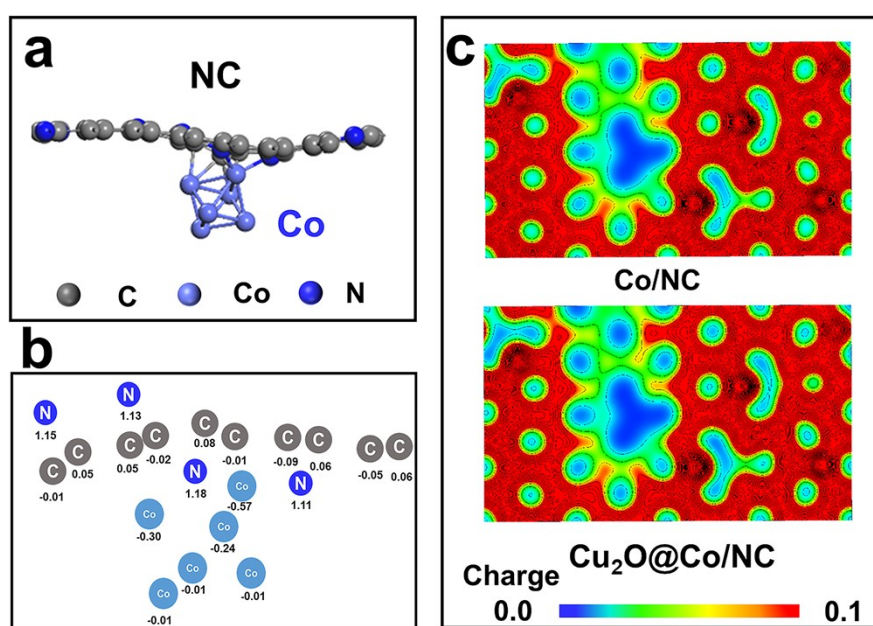

Fig S2. (a) Model of Co/NC. (b) Calculated charge of atoms of Co/NC. (c) Charge density

distribution.

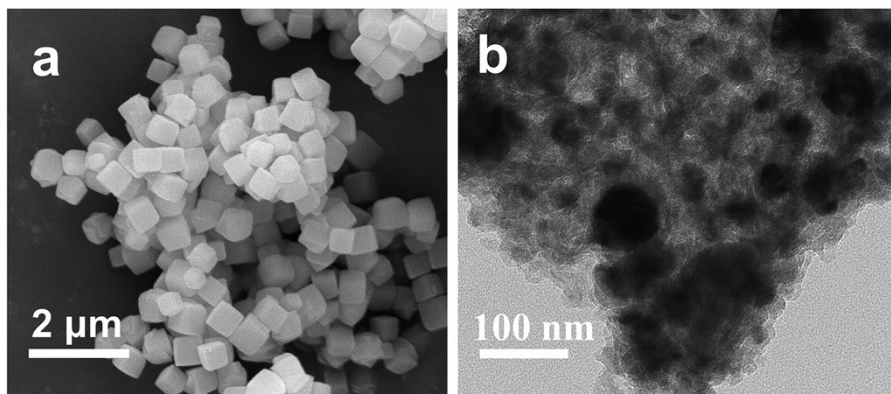

**Figure S3.** (a) SEM image of ZIF-67 and (b) TEM image of Co/NC.

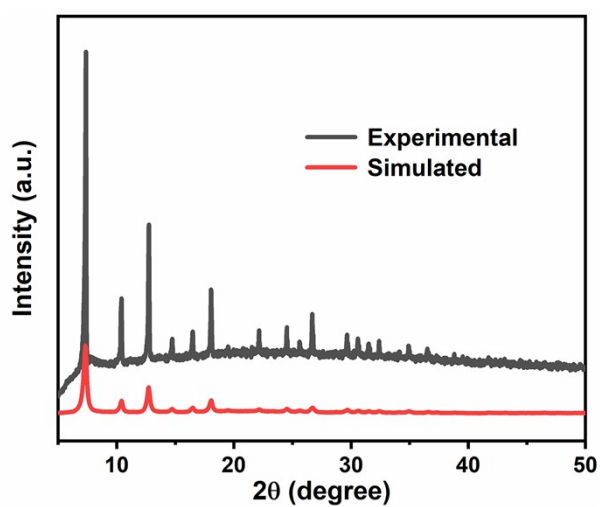

**Figure S4.** XRD patterns of ZIF-67 precursor.

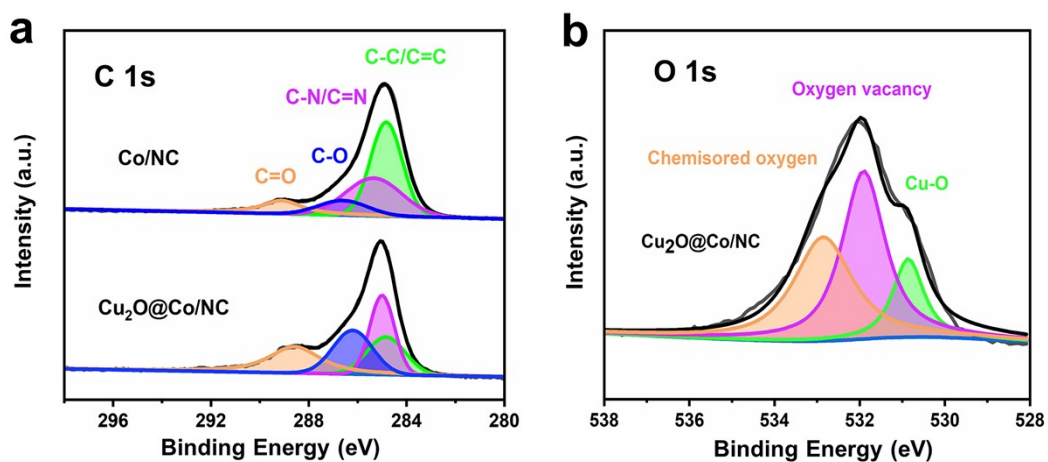

**Figure S5.** XPS spectra of Cu<sub>2</sub>O@Co/NC in the C 1s (a) and O 1s (b) region.

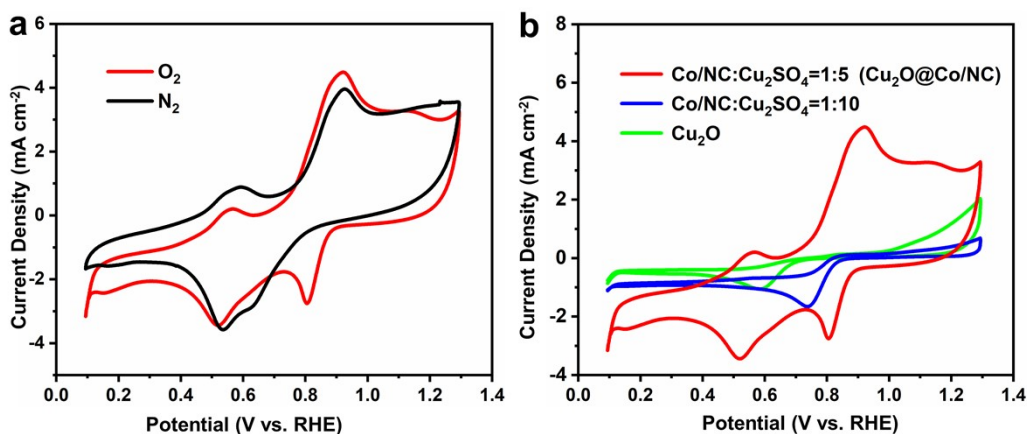

**Figure S6.** (a) CV curves in O<sub>2</sub>-saturated and N<sub>2</sub>-saturated 0.1 M KOH of Cu<sub>2</sub>O@Co/NC (b) CV curves of different ratios.

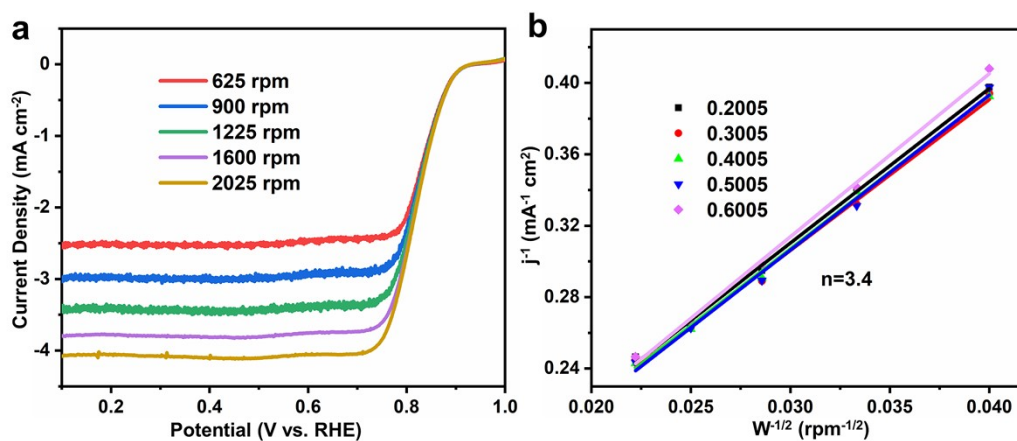

**Figure S7.** (a) LSV of Cu<sub>2</sub>O@Co/NC with different electrode rotation speeds (b) the corresponding K-L plots at different potentials.

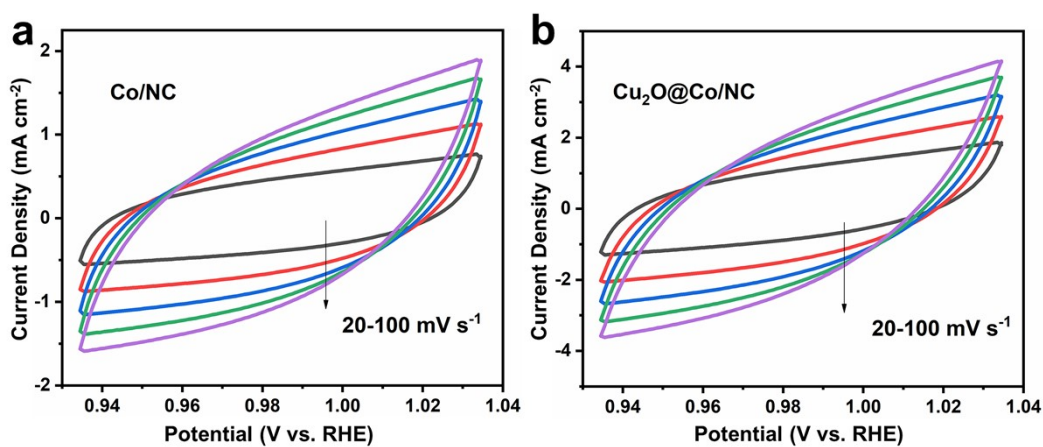

**Figure S8.** CV curves of (a) Co/NC and (b) Cu<sub>2</sub>O@Co/NC in the non-faradic capacitance current range from 20 to 100 mV s<sup>-1</sup>.

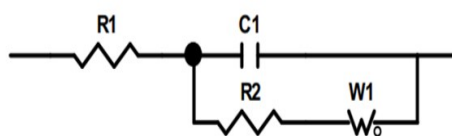

**Figure S9.** Equivalent circuit.

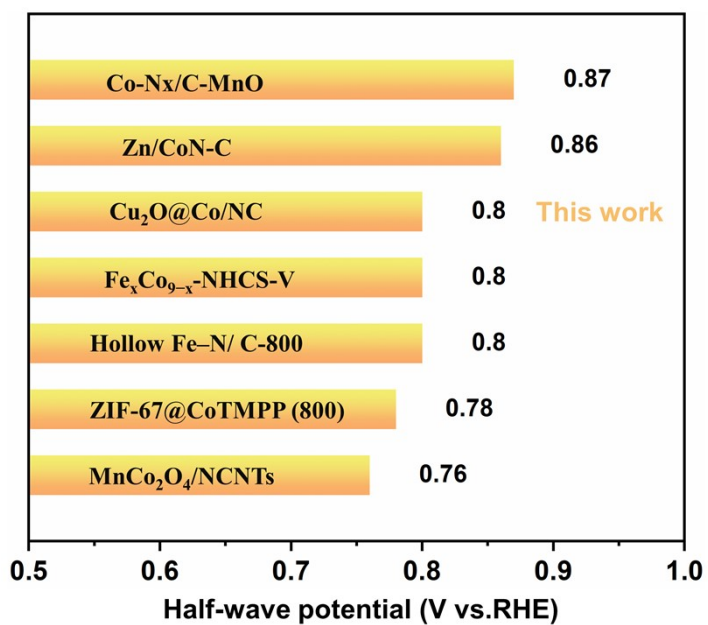

**Figure S10.** Half-wave potential of various ORR catalysts<sup>1-6</sup>.

**Table S1.** Impedance fitting results.

|                | Pt/C (Ohm cm <sup>-2</sup> ) | Cu <sub>2</sub> O@Co/NC (Ohm cm <sup>-2</sup> ) | Co/NC (Ohm cm <sup>-2</sup> ) |
|----------------|------------------------------|-------------------------------------------------|-------------------------------|
| R <sub>1</sub> | 0.245                        | 0.283                                           | 0.193                         |
| R <sub>2</sub> | 2.831                        | 3.605                                           | 4.957                         |

**Table S2.** Summary of ORR activities of various catalysts in 0.1M KOH.

| Catalysts                                 | Half-wave potential (V) | Onset potential (V) | Limiting current density (mA cm <sup>-2</sup> ) | Tafel slope (mV dec <sup>-1</sup> ) | Ref.      |
|-------------------------------------------|-------------------------|---------------------|-------------------------------------------------|-------------------------------------|-----------|
| Co-N <sub>x</sub> /C-MnO                  | 0.87                    | 0.93                | 5.76                                            | 79.5                                | 1         |
| MnCo <sub>2</sub> O <sub>4</sub> /NCNTs   | 0.76                    | /                   | 6.06                                            | 61.9                                | 2         |
| Fe <sub>x</sub> Co <sub>9-x</sub> -NHCS-V | 0.80                    | /                   | /                                               | 55.75                               | 3         |
| Hollow Fe-N/ C-800                        | 0.80                    | 0.99                | 5.19                                            | 76.33                               | 4         |
| ZIF-67@CoTMPP (800)                       | 0.78                    | 0.85                | /                                               | 56                                  | 5         |
| Zn/CoN-C                                  | 0.86                    | 1.00                | 6.1                                             | 67                                  | 6         |
| Cu <sub>2</sub> O@Co/NC                   | 0.80                    | 0.89                | 3.80                                            | 62.99                               | this work |

**Table S3.** Comparison of MFCs performance with different cathode catalysts.

| <b>Anode</b> | <b>Cathode</b>                        | <b>External resistance</b> | <b>Output voltage</b> | <b>Power density</b>      | <b>Reference</b> |
|--------------|---------------------------------------|----------------------------|-----------------------|---------------------------|------------------|
| carbon cloth | GO-Zn/Co (1:1)-800                    | 1000 $\Omega$              | 145 mV                | 773 mW m <sup>-2</sup>    | 7                |
| carbon cloth | GCN-Co@CoO                            | 1000 $\Omega$              | 600 mV                | 611±9 mW m <sup>-2</sup>  | 8                |
| carbon paper | Ag/Co-N-C                             | /                          | 502 ± 12 mV           | 548±12 mW m <sup>-2</sup> | 9                |
| carbon felt  | MPC-800                               | 1000 $\Omega$              | 470 mV                | 240 mW m <sup>-2</sup>    | 10               |
| carbon felt  | GO/MgO                                | 1000 $\Omega$              | 354 mV                | 755.63 mW m <sup>-2</sup> | 11               |
| carbon felt  | Mn-Fe@g-C <sub>3</sub> N <sub>4</sub> | 1000 $\Omega$              | 450 mV                | 413±7 mW m <sup>-2</sup>  | 12               |
| carbon cloth | Cu <sub>2</sub> O@Co/NC               | 1000 $\Omega$              | 430 mV                | 1100 mW m <sup>-2</sup>   | this work        |

## References

1. C. Chen, Z. J. Tang, J. Y. Li, C. Y. Du, T. Ouyang, K. Xiao and Z. Q. Liu, MnO enabling highly efficient and stable Co-Nx/C for oxygen reduction reaction in both acidic and alkaline media, *Advanced Functional Materials*, 2022, 202210143.
2. Z. Wang, J. Huang, L. Wang, Y. Liu, W. Liu, S. Zhao and Z. Q. Liu, Cation-tuning induced d-band center modulation on Co-based spinel oxide for oxygen reduction/evolution reaction, *Angewandte Chemie International Edition*, 2022, **61**, e202114696.
3. S.-J. Li, Y. Xie, B.-L. Lai, Y. Liang, K. Xiao, T. Ouyang, N. Li and Z.-Q. Liu, Atomic modulation of Fe-Co pentlandite coupled with nitrogen-doped carbon sphere for boosting oxygen catalysis, *Chinese Journal of Catalysis*, 2022, **43**, 1502-1510.
4. X. T. Wu, L. J. Peng, K. Xiao, N. Li and Z. Q. Liu, Rational design and synthesis of hollow Fe-N/C electrocatalysts for enhanced oxygen reduction reaction, *Chemical Communications (Camb)*, 2021, **57**, 5258-5261.
5. L. Wang, X. Jin, J. Fu, Q. Jiang, Y. Xie, J. Huang and L. Xu, Mesoporous non-noble metal electrocatalyst derived from ZIF-67 and cobalt porphyrin for the oxygen reduction in alkaline solution, *Journal of Electroanalytical Chemistry*, 2018, **825**, 65-72.
6. Z. Lu, B. Wang, Y. Hu, W. Liu, Y. Zhao, R. Yang, Z. Li, J. Luo, B. Chi, Z. Jiang, M. Li, S. Mu, S. Liao, J. Zhang and X. Sun, An isolated zinc-cobalt atomic pair for highly active and durable oxygen reduction, *Angewandte Chemie International Edition*, 2019, **58**, 2622-2626.
7. W. Yang, G. Chata, Y. Zhang, Y. Peng, J. E. Lu, N. Wang, R. Mercado, J. Li and S. Chen, Graphene oxide-supported zinc cobalt oxides as effective cathode catalysts for microbial fuel cell: High catalytic activity and inhibition of biofilm formation, *Nano Energy*, 2019, **57**, 811-819.
8. L. Tan, Q.-R. Pan, X.-T. Wu, N. Li, J.-H. Song and Z.-Q. Liu, Core@shelled Co/CoO embedded nitrogen-doped carbon nanosheets coupled graphene as efficient cathode catalysts for enhanced oxygen reduction reaction in microbial fuel cells, *ACS Sustainable Chemistry & Engineering*, 2019, **7**, 6335-6344.
9. P. Y. Jiang, Z. H. Xiao, Y. F. Wang, N. Li and Z. Q. Liu, Enhanced performance of microbial fuel cells using Ag nanoparticles modified Co, N co-doped carbon nanosheets as bifunctional cathode catalyst, *Bioelectrochemistry*, 2021, **138**, 107717.
10. Z. Zha, Z. Zhang, P. Xiang, H. Zhu, X. Shi and S. Chen, Porous graphitic carbon from mangosteen peel as efficient electrocatalyst in microbial fuel cells, *Science of The Total Environment*, 2021, **764**, 142918.
11. M. Li, S. Zhou and M. Xu, Graphene oxide supported magnesium oxide as an efficient cathode catalyst for power generation and wastewater treatment in single chamber microbial fuel cells, *Chemical Engineering Journal*, 2017, **328**, 106-116.
12. K. Zhong, Y. Wang, Q. Wu, H. You, H. Zhang, M. Su, R. Liang, J. Zuo, S. Yang and J. Tang, Highly conductive skeleton Graphitic-C<sub>3</sub>N<sub>4</sub> assisted Fe-based metal-organic frameworks derived porous bimetallic carbon nanofiber for enhanced oxygen-reduction performance in microbial fuel cells, *Journal of Power Sources*, 2020, **467**.
